# Supplementary material for: Considerations for ethics review of big data health research: A scoping review
Source: PLoS One. 2018 Oct 11;13(10):e0204937. doi: 10.1371/journal.pone.0204937 (PMC6181558; doi:10.1371/journal.pone.0204937)
Supplement: S2 File — (XLSX) [file pone.0204937.s002.xlsx]

## Sheet: Sheet1
Author	Year	Medical Speciality	Benefits envisioned	Major ChALLenges Observed	Focus on Ethics (direct/indirect)	Which Ethical Considerations?	Focus on Research Ethics (YES/NO)	Implications for EC
Aarts et al	2016
Achiron	2017	Ophtalmology	QoC (Clinical Decision Making)		indirect		NO
			Healthcare Management (Risk assessment)
Agar	1992
Ahmed	2017	ALL	QoC (P4)		indirect		NO
			QoC (Theraphy)
			Healthcare Management (Reducing costs)
			Biomedical Research
			Healthcare Management (Access to Health)
Al Kazzi	2015	ALL	QoC (P4)		indirect	Fairness & Justice	NO
			QoC (Therapy)			Safety
			Healthcare Management (Risk-Assessment)
			QoC
AlShomrani	2017	ALL		Technical	direct	Privacy	NO
				Ethical
Alaa	2016	Oncology	QoC (P4)		indirect		NO
			QoC (Diagnostics)
Alemayeuh	2016	ALL	QoC (P4)	Infrastructural	indirect	Privacy	YES	non empirical
			Biomedical Research	Social		Confidentiality
				Methodological		Informed Consent
				Ethical		Utility
						Data Ownership
						Transparency
Anderson	2011	Geriatrics	QoC (Clinical decision-making)	Ethical	direct		NO
Andreu-Perez	2011	ALL	Biomedical Research	Methodological	indirect	Privacy	NO
			QoC			Accountability
						Data Ownership
Antes	2016	ALL	Biomedical Research	Methodological	indirect	Privacy	NO
Antman	2015	Cardiology	Biomedical research (Real World Data)	Infrastructural	indirect	Privacy	NO
		Neurology		Technical		Informed Consent
				Methodological		Confidentiality
				Ethical		Safety
				Social		Fairness & Justice
Arista	2016	ALL	Healthcare Management (Reducing Costs)	Methodological	indirect	Data ownership	NO
			QoC (Clinical Decision Making)	Technical
			Biomedical Research (Medical Technology development)	Ethical
			Biomedical Research
Armstrong	2016	ALL	Prevention	Methodological	indirect	Risk of discrimination	NO
			QoC (Therapy)			Patient Empowerment
			QoC (P4)			Fairness & Justice
Arora	2017	ALL	Healthcare Management (Reduce costs)	Technical	indirect		NO
			QoC (P4)	Ethical		Privacy
Ashrafian	2015	ALL	Qoc (Diagnostics)		indirect		NO
			QoC
Audrey	2016	ALL	QoC (Therapy)	Technical	direct	Informed Consent	YES	empirical
			Healthcare Management (Reduced Costs)	Ethical		Privacy
			Biomedical research (Real World Data)	Methodological
Auffray	2016	ALL	Biomedical Research	Methodological	indirect		NO
			Prevention	Technical		Privacy
				Regulatory
			QoC (Diagnostics)			Patient Empowerment
			Healthcare Management (Reduced Costs)			Fairness & Justice
			QoC (P4)
			QoC (Theraphy)
Bae	2014
Bakker	2016
Balas	2015	ALL	QoC (Theraphy)	Technical	direct	Privacy	YES	empirical
			Prevention	Infrastructural		Confidentiality
			QoC	Ethical		Beneficence
						Safety (non-maleficience)
Bates	2014	ALL	Healthcare Management (Reduce costs)	Methodological	indirect	Fairness & Justice	NO
			Healthcare Management (Resources Allocation)	Technical		Privacy
			QoC (Diagnostics)	Regulatory
				Financial
			QoC (Theraphy)	Ethical
Beck	2016	Epidemiology	Healthcare Management (Reduce costs)	Ethical	direct	Confidentiality	NO
		Immunology	QoC (Diagnostics)	Social		Fairness & Justice
			QoC (Health Monitoring			Risk of discrimination
						Trust
Behadada	2016	Cardiology	QoC (Diagnostics)	Technical	indirect		NO
			QoC (P4)
Benedict	2016	Oncology	QoC (Theraphy)	Methodological	indirect	Trust	NO
		Radiology	QoC
Bennett	2012	ALL	QoC (Clinical Decision Making)		indirect		NO
			QoC (P4)
			Biomedical research (Real World Data)
			QoC (Patient Safety)
Beranger	2012
Berg	2014	ALL	Healthcare Management (Reduce costs)	Ethical	indirect	Safety	NO
			QoC (Patient Safety)			Utility
			QoC
Berger	2015	ALL	Biomedical research (Real World Data)	Ethical	indirect	Data ownership	NO
			QoC (P4)	Regulatory		Privacy
			QoC	Social		Fairness & Justice
						Patient Empowerment
Berman	2002	ALL		Ethical	direct	Privacy	YES	non empirical
				Technical		Fairness & Justice
Bhattacharjee	2017	Immunology	Prevention		indirect	Privacy	NO
			QoC (Diagnostics)
Bittrich	2016
Blobel	2016	ALL	QoC	Ethical	direct	Privacy	NO
			QoC (P$)	technical
			Prevention			trust
Blumer	2017	Nursing	Qoc	Methodological	indirect	Accountability	NO
						Privacy
Bonato	2004	Neurology	QoC (Diagnostics)		indirect	Privacy	NO
Bouè
Bourke	2016
Bram	2015	ALL	QoC (Health Monitoring)	Technical	indirect		NO
			Healthcare Management (Resource Allocation)	Infrastructural
			Healthcare Management (Health Education)
Brennan	2015	Nursing	Biomedical Research	Social	indirect		NO
			QoC
Broes	2017	Oncology	QoC	Ethical	indirect	Privacy	NO
				Technical		Informed Consent
Broughmann	2016	Oncology	QoC		indirect		NO
Brouwer	2017
Brownstein	2015	ALL	QoC (Diagnostics)		indirect	Privacy	NO
			QoC
Burgess	2012
Cabitza	2016
Capone	2016
Capone	2015	ALL	QoC		indirect		NO
			Healthcare Management (Reducing costs)
Cavaro-Menard	2013	ALL	QoC	Technical	indirect		NO
			Healthcare Management (Access to Health)
Chandra	2017	ALL	QoC (Health Monitoring)	Ethical	indirect	Privacy	NO
			Healthcare Management (Resource Allocation)	Technical
			Healthcare Management (Reducing costs)
			QoC
Chary	2013	ALL	Biomedical Research (Real World Data)		indirect		NO
			Biomedical Research
Chawla	2013	ALL	Qoc (P4)		indirect		NO
			Healthcare Management (cost-effectiveness)
			QoC
Chen	2014	ALL	Healthcare Management (cost-effectiveness)	Technical	indirect	Privacy	NO
Chen	2016
Choudury	2014	Neurology	Biomedical Research	Technical	indirect	Privacy	NO
				Regulatory		Confidentiality
			Prevention	Methodological
				Social
Chow-White	2015	Medical Genetics	Qoc (P4)	Ethical	direct	Informed consent	YES	Non empirical
				Technical		Privacy
						Patient Empowerment
Christen	2016	Neurology	Biomedical Research	Methodological	direct		YES	Non empirical
			QoC (Clinical Decision Making)	Ethical		Privacy
			QoC (Diagnostics)	Technical		Informed consent
				Regulatory		Utility
Christen	2016	Psychiatry		Regulatory	direct	Informed consent	YES	Non empirical
				Ethical		Privacy
						Trust
						Autonomy
Christodoulakis	2016	ALL	QoC	Regulatory	indirect	Confidenciality	NO
			QoC (Diagnostics)	Methodological
			Healthcare Management (cost-effectiveness)
Coglianese	2017	ALL	QoC (Clinical Decision Making)		indirect	Fairness & Justice	NO
			Prevention			Utility
						Safety
						Privacy
Cohen	2014	ALL	Prevention	Technical	indirect		NO
			Biomedical Research	Methodological		Privacy
			QoC (Clinical Decision Making)	Social		Informed consent
				Regulatory
Cohen	2015	ALL	Healthcare Management (cost-effectiveness)	Technical	indirect	Privacy	YES	empirical
			Biomedical Research	Infrastructural
				Financial		Informed Consent
						Fairness & Justice
						Risk of discrimination
						Transparency
Colljin	2017	ALL	QoC (P4)	Methodological	indirect	Transparency	NO
			QoC (Diagnostics)	Technical		Fairness & Justice
			Prevention	Social		Informed Consent
				Ethical
				Regulatory
Connors	2016
Conway	2014	ALL	Prevention	Ethical	direct	Privacy	YES	empirical
			QoC (Health Monitoring)	Methodological		informed consent
			Healthcare Management (Access to Health)	Financial		Fairness & Justice
			Healthcare Management (Resource Allocation)			Beneficence
Dahl	2013
Daien	2017	Ophtalmology	Prevention	Technical	indirect		NO
			QoC (Health Monitoring)	Methodological
			Biomedical Research
De Martino	2013	Oncology	Healthcare Management (cost-effectiveness)	Technical	indirect	Safety	NO
			Biomedical Research	Methodological		Fairness & Justice
			QoC (Clinical Decision Making)	Regulatory
			QoC
Dereli	2014	ALL	Healthcare Management (Access to Health)	Infrastructural	direct	Informed consent	YES	non empirical
				Methodological
						Risk of Discrimination
De Rosa	2014
Deschamps	2016
Deschamps
Dimitrov	2016	ALL	Healthcare Management (cost-effectiveness)	Technical	indirect	Privacy	NO
			QoC (Clinical Decision Making)	Regulatory		Risk of discrimination
			Prevention	Infrastructural		Informed Consent
			QoC (Health Monitoring)
Docherty	2015	ALL	QoC	Technical	indirect	Confidentiality	NO
			Biomedical Research	Ethical		Privacy
			Healthcare Management (cost-effectiveness)			Autonomy
			QoC (P4)
Dolin	2015	ALL	Biomedical Research (Data Availability)		indirect		NO
Douali	2012	Medical Genetics	QoC (P4)		indirect	Safety	NO
			Healthcare Management (cost-effectiveness)
			QoC
Etheredge	2014	ALL	Biomedical Research (Data Availability)	Methodological	indirect	Utility	NO
			Healthcare Management (cost-effectiveness)	Technical		Confidentiality
			QoC (Clinical Decision Making)
			Biomedical Research
Everett	2013
Faden	2013	ALL	QoC (Diagnostics)		direct	Fairness & Justice	YES	non empirical
			QoC			Privacy
						Human rights & Dignity
Feldman	2015	ALL	QoC (Clinical Decision Making)		indirect		NO
Fleurence	2014	ALL	Biomedical Research	Technical	indirect	Patient Empowerment	YES	non empirical
			Healthcare Management (cost-effectiveness)	Regulatory		Privacy
			QoC (P4)	Ethical		Informed consent
			QoC			Trust
						Autonomy
Fox	2016	ALL	Prevention	Technical	direct	Utility	NO
			QoC	Ethical		Privacy
			QoC (P4)	Financial
						Fairness & Justice
						Accountability
Furnback	2014
Gal	2017	Oncology	QoC (P4)	Regulatory	indirect	Safety	NO
			QoC (Clinical Decision Making)	Technical		Privacy
				Ethical
GALLagher	2001
GALLardo	2008
Gao	2017	ALL	QoC (Patient Safety)		indirect		NO
			Healthcare Management (Risk Assessment)
Garattini	2017	Immunology	Prevention	Technical	direct	Fairness & Justice	YES	non empirical
			QoC (Health Monitoring)	Ethical		informed consent
						Trust
						Transparency
						Privacy
Geissbühler	2013	ALL	Biomedical Research	Regulatory	indirect	Privacy	NO
			QoC	Technical		informed consent
				Ethical		Trust
Germano	2015	ALL	QoC (Diagnostics)	Financial	indirect		NO
			QoC (Therapy)
			QoC (Clinical Decision Making)
			QoC
Giest	2017	ALL	Healthcare Management (Resource Allocation)	Ethical	indirect	Safety	NO
				Technical		Privacy
				Regulatory
Gillespie	2016	ALL	QoC	Technical	indirect	informed consent	NO
			Healthcare Management (Health Education)	Ethical
Gjerdrum	2016	ALL	QoC	Ethical	direct	Privacy	NO
			QoC (P4)	Technical
				Methodological		informed consent
						Human rights & Dignity
Gleichgerrecht	2015	Neurology	Prevention	methodological	indirect		NO
			QoC (Diagnostics)
Glover	2016
Goel	2012	ALL	QoC		indirect		NO
			QoC (Health Monitoring)
Goetgebheur	2015
Gold	2015	Psychiatry	Biomedical Research	Infrastructural	indirect	Transparency	NO
				Ethical		Privacy
Goldstein	2016
Goessens	2015	ALL	Prevention	Methodological	indirect	Accountability	NO
			QoC (Diagnostics)	Technical
Grasso	2016	Rheumathology	Biomedical Research		indirect		NO
Gray	2016	ALL	Healthcare Management (cost-effectiveness)	Ethical	direct	Privacy	YES	non empirical
			QoC (P4)	Regulatory		utility
			QoC	Methodological		informed consent
Green	2016	Radiology	Biomedical Research	Technical	indirect	Privacy	NO
				Ethical		Dual-use
Groot	2008
Grossi	2006	Cardiology	Healthcare Management (Risk Assessment)	Technical	indirect		NO
			Prevention	Methodological
Gupta	2014	Oncology	Prevention	Technical	indirect		NO
			QoC
			QoC (P4)
Gupta	2016	ALL	QoC		indirect		NO
			Healthcare Management (Access to Health)
Hammer	2017	ALL		Ethical	direct	Informed consent	YES	non empirical
				Regulatory
Hammerla	2015	Neurology	Biomedical research (Real World Data)	Social	indirect		NO
Harkens	2016	ALL	QoC	Ethical	direct	Privacy	NO
				Regulatory		Data ownership
						Transparency
						Risk of discrimination
Heitmueller	2014	ALL	QoC (Health Monitoring)	Technical	indirect	Privacy	NO
			Prevention	Financial		Transparency
			QoC (P4)	Ethical		Trust
						Human Rights & Dignity
						Data ownership
Hernandez-Boussard	2014
Higuchi	2013	ALL	QoC (Diagnostics)	Ethical	indirect	Safety (Non-maleficience)	NO
			Prevention	Technical		Beneficence
						Autonomy
						Fairness & Justice
						Human Rights and Dignity
Hilbert	2016
Hinman	2016	Neurology	QoC (Therapy)	Ethical
			Healthcare Management (cost-effectiveness)	Techncial		Fairness & Justice
			QoC
			QoC (P4)	Technical	indirect		NO
			QoC (Diagnostics)	Methodological
			QoC (Patient Safety)
Hoffman	2016
Hoffman	2013	ALL	Biomedical Research	Technical	indirect	Safety	NO
			QoC	Methodological
Holm	2017	ALL	Biomedical Research	Ethical	direct	Informed consent	YES	non empirical
			QoC			Trust
						Privacy
Hossain	2016	ALL	Prevention	Technical	indirect		NO
			QoC	Methodological
Househ	2017	ALL	Prevention	Technical	indirect		NO
			QoC (Therapy)	Methodological
			QoC (Clinical DecisionMaking)
Househ	2017	ALL	QoC	Technical	indirect	Privacy	NO
			QoC (Health Monitoring)	Methodological		Trust
			QoC (Clinical DecisionMaking)	Ethical		Safety
Hovenga	2013	ALL	QoC	Technical	indirect	Safety	NO
			Healthcare Management (cost-effectiveness)	Methodological		Trust
				Regulatory
Howard	2017	ALL		Technical	direct	Risk of discrimination	NO
				Ethical		Fairness & Justice
Howard	2017	Medical Genetics	Biomedical Research	Technical	indirect	Fairness & Justice	NO
			QoC			Transparency
						Informed consent
Howie	2014	ALL	Healthcare Management (cost-effectiveness)		indirect		NO
			QoC
Hrovat	2014	ALL	QoC (Clinical Decision-Making)		indirect		NO
			Healthcare Management (cost-effectiveness)
Huang	2013	ALL	QoC (Clinical Decision-Making)		indirect		NO
			Healthcare Management (Resource Allocation)
Huertas	2017	ALL		Ethical	indirect	Privacy	NO
				Technical
Hui	2015
Huriet	2015
Hussein	2010	Geriatrics	QoC (Clinical Decision-Making)		indirect		NO
			QoC (Diagnostics)
			Healthcare Management (cost-effectiveness)
			Healthcare Management (Access to Health)
Ingram	2004
Ioannidis	2013	ALL		Ethical	direct	Informed consent	YES	non empirical
				Methodological		Privacy
						Human Rights & Dignity
						Transparency
						Patient Empowerment
Ishikawa	2016	ALL	QoC	Technical	indirect	Privacy	NO
				Methodological
Johar	2016
Johnson	2016	ALL	QoC (P4)	Methodological	indirect	Privacy	NO
			QoC (Clinical Decision-Making)	Technical
			QoC (Health Monitoring)
Jubelt	2015
Jung	2014
Kass	2013	ALL	QoC		indirect	Privacy	YES	non empirical
			QoC (Clinical Decision-Making)
			QoC (Patient Safety)
			QoC (Health Monitoring)
Kennedy	2014
Khoury	2013	Oncology		Technical	indirect	Informed consent	NO
						Privacy
						Data ownership
Kim A.	2017	Dietology		Technical	indirect		NO
Kim M.	2017
King	2011	ALL		Technical	indirect	Privacy	NO
				Infrastructural		Fairness & Justice
				Ethical		Informed consent
Kirouac	2015
Knoppers	2017	Medical Genetics	QoC	Technical	indirect	Privacy	NO
			Healthcare Management (cost-effectiveness)	Ethical		Risk of discrimination
Kolker	2016	ALL	QoC (P4)		indirect	faireness	NO
Kostkova	2016		QoC	Ethical	direct	Trust	NO
			Biomedical Research	Technical		data ownership
				Social		Privacy
						Transparency
Kravetz	2016
Krumholz	2014	ALL	Prevention	technical	indirect	Privacy	NO
			Biomedical Research	Ethical		Informed consent
Kruskal	2017
Kuceyeski	2015	Neurology	Biomedical Research		indirect		NO
Kuller	2014	ALL	Biomedical Research	Technical	indirect	Privacy	NO
			Healthcare management			Transparency
Kumar	2016	ALL	QoC (P4)	Infrastructural	indirect	Privacy	NO
			Prevention	Technical
Kyriazis	2017	ALL	QoC (P4)	Technical	indirect	Privacy	NO
						Informed consent
Laffan	2016
Lambin	2012
Larson	2013	ALL	Healthcare Management (Access to Health)	technical	direct	Privacy	NO
			QoC (Health Monitoring)	ethical		trust
			Healthcare Management (cost-effectiveness)			informed consent
Lea	2016	ALL	QoC	technical	indirect	trust	YES	non empirical
			Biomedical Research	ethical		safety
Lee C.	2017	ALL	QoC (Health Monitoring)	technical	indirect	trust	NO
			QoC (Patient safety)	methodological		transparency
			Biomedical Research	ethical
			Healthcare Management (cost-effectiveness)	regulatory
Lee E.	2016	Infectuous diseases	QoC (Health Monitoring)	Regulatory	indirect	Privacy	NO
			QoC (Clinical Decision-Making)	technical
			QoC (Diagnostics)
Lee S.	2017	Oncology	Biomedical Research		indirect	Privacy	NO
Lee Y.	2016	ALL		technical	indirect	Privacy	NO
				regulatory
Leyens	2017	ALL	QoC	Technical	indirect	Privacy	NO
			Biomedical research (Real World Data)	Methodological		Data ownership
Li H.	2015
Li S.	2015		QoC	Technical	indirect		NO
				Regulatory
Li X.	2016	Medical Genetics	Biomedical Research		indirect		NO
			QoC (P4)
Liu	2017	Radiology	QoC (Diagnostics)		indirect		NO
Liyanage	2014	Immunology	Biomedical research (Real World Data)	technical	direct	Privacy	NO
			Healthcare Management (cost-effectiveness)	Methodological		Patient Empowerment
						data ownership
Liyanage	2012	Immunology	QoC	Methodological	indirect	Privacy	NO
			Healthcare Management (cost-effectiveness)	Technical
Lori	2016	Radiology			indirect		NO
Lovis	2015		QoC (P4)	Methodological	direct	Privacy	NO
				Regulatory
				Technical
Lu	2017	ALL	QoC (Health Monitoring)	Regulatory	indirect	Privacy	NO
				Ethical		Confidentiality
				Technical
Ludwin	2017	ALL		Ethical	direct	Privacy	YES	non empirical
				Technical
Luna	2014	ALL	QoC (P4)	Infrastructural	indirect	Privacy	NO
			Biomedical Research	Methodological
			Healthcare Management (Access to Health)	Ethical
				Financial
Luo	2016	ALL		Methodological	indirect		NO
Lupton	2014	ALL	Biomedical Research	Methodological	indirect	Accountability	NO
			QoC	Social
Lustig	2016		QoC (Clinical Decision-Making)		direct	transparency	NO
			Healthcare Management (cost-effectiveness)			accountability
Luxton	2014
Luxton	2015
Machluf	2017	ALL	Prevention	Methodological	indirect	Privacy	NO
			QoC (Clinical Decision-Making)	Regulatory
				Social
Mamzer Bruneel	2017
Martin C.	2014	ALL	QoC (P4)	Methodological	indirect	Privacy	NO
				Technical		Trust
						Transparency
Martin D.	2017	ALL	QoC (Clinical Decision-Making)	Ethical	direct	accountability	NO
				Methodological
Martin-Sanchez	2014	ALL	Biomedical Research	Methodological	indirect	Privacy	NO
				Technical
Martini	2015	Geriatrics	QoC (Health Monitoring)		indirect		NO
Marx-Rubiner	2017	Oncology	QoC	Methodological	indirect		NO
			Prevention
			QoC (Health Monitoring)
Mason	2017
Mayer	2016	ALL	Prevention	Methodological	indirect	Privacy	NO
			QoC (Health Monitoring)	Technical		Patient Empowerment
			Healthcare Management (Access to Health)
Mayo	2017	Oncology	QoC	Technical	indirect	Privacy	NO
			Biomedical Research	Regulatory
			Healthcare Management (cost-effectiveness)
McIyntre	2014	Psychiatry	Prevention	Technical	indirect		NO
McKinney	2013
McLeod	2016	Opthalmology	QoC		indirect		NO
McNelly	2014	ALL	Healthcare Management (cost-effectiveness)	Methodological	indirect	Privacy	NO
			QoC (Clinical Decision Making)	Technical
				Ethical
Megherbi	2012	Nephrology	Prevention		indirect		NO
			QoC (Diagnostics)
Mendelson	2017	ALL	QoC (Clinical Decision Making)	Ethical	direct	Privacy	NO
			Healthcare Management (cost-effectiveness)	Regulatory
Metcalf	2016	ALL	Biomedical Research	Ethical	direct	Privacy	YES	non empirical
			Healthcare Management (Risk Assessment)	Regulatory		Utility
Milham	2017	Neurology	Prevention	Methodological	indirect		NO
			QoC
			Biomedical Research
Molioli	2016
Milton	2017	ALL	QoC	Technical	indirect	Safety	NO
			QoC (Clinical Decision Making)			Privacy
			QoC (Patient Safety)			Confidentiality
			Healthcare Management (Health Education)
Mittelstadt	2016
Monsen	2015	ALL	QoC	Methodological	indirect		NO
Monteith	2016	Psychiatry	Biomedical Research	Technical	indirect	Privacy	NO
						Confidentiality
Mooney	2015	ALL	Biomedical Research	Methodological	indirect		NO
Mostert	2016	ALL	Biomedical Research		direct	Privacy	NO
						Informed consent
						Data ownership
						Patient Empowerment
Murno	2017	Neurology	QoC	Technical	indirect		NO
Naeemi	2016	Nuclear medicine	Healthcare Management (cost-effectiveness)	technical	indirect		NO
			QoC (Diagnostics)
			QoC (Health Monitoring)
Nicogossian	2012		Healthcare Management (cost-effectiveness)	Financial	indirect	Fairness & Justice	NO
			Healthcare Management (Acces to Health)
Noor	2015	Oncology		Methodological	indirect	Privacy	YES	non empirical
		Medical Genetics				Fairness & Justice
						Informed consent
Nunan	2013	ALL	Biomedical Research		direct	Privacy	NO
			QoC (Clinical Decision Making)			Confidentiality
Oliveira	2014	ALL	QoC		indirect		NO
			QoC (Clinical Decision Making)
Omar	2016	Nuclear medicine	QoC (P4)		indirect		NO
			Prevention
			QoC (Diagnostics)
Ossorio	2014	ALL	Biomedical Research		direct	Privacy	YES	non empirical
						Fairness & Justice
						Informed consent
Ozdemir	2014	ALL	QoC (P4)		indirect		NO
			QoC
Ozdemir	2017	Psychiatry	Biomedical Research (data availability)	Social	indirect	Privacy	NO
			Biomedical Research
			QoC (Therapy)
Pah	2015	Cardiology	Biomedical research (Real World Data)		indirect	Privacy	NO
			Prevention
			QoC (P4)
Pandria	2015	Psychiatry	QoC		indirect		NO
			QoC (Diagnostics)
Park	2014
Payakachat	2016	Psychiatry	Biomedical Research		indirect		NO
			QoC
			Biomedical Research
Perakslis	2014	ALL	QoC (P4)	Ethical	indirect	Informed consent	NO
				Methodological		Privacy
						Data ownership
Phillips	2017	Medical Genetics	QoC (P4)	Financial	indirect		NO
			Healthcare Management (cost-effectiveness
Phillips	2014	Medical Genetics	Healthcare Management (cost-effectiveness	Ethical	indirect	Privacy	NO
			QoC (P4)	Financial		informed consent
			QoC (Patient Safety)			Fairness & Justice
Pimple	2014
Pinheiro	2016	ALL	Healthcare Management (cost-effectiveness		indirect		NO
			QoC (Therapy)
Poh	2014
Pohl	2017
Porsdam Mann	2016	Psychiatry	Prevention		direct	Privacy	YES	non empirical
						Confidentiality
						Autonomy
						Informed consent
Poulymenopoulou	2015	Dietology	QoC (Health Monitoring)	Methodological	indirect		NO
			Healthcare Management (cost-effectiveness)	Technical		Trust
Pratap	2014	Psychiatry	QoC (P4)		indirect		NO
Prieto	2017	Immunology	QoC (Health Monitoring)		indirect		NO
			Healthcare Management (Acces to Health)
Raghumpathi	2014	ALL	Biomedical Research	Technical	indirect	Privacy	NO
			Qoc	Ethical		Data ownership
			QoC (Health Monitoring)
Ramsak	2011
Ratliff	2016	ALL	QoC (P4)		indirect		NO
Razzouk	2006	Psychiatry	QoC (Diagnostics)		indirect		NO
			QoC (Clinical Decision Making)
Reches	2017	Neurology	QoC (Clinical Decision Making)		indirect		NO
			QoC (Diagnostics)
Redmond	2014	ALL	QoC (Health Monitoring)	Technical	indirect	Fairness & Justice	NO
						Risk of discrimination
						Privacy
Rey	2016	ALL	QoC (Health Monitoring)	Technical	indirect		NO
Rivers	2014	ALL	QoC (Health Monitoring)	Technical	direct	Privacy	YES	non empirical
				Ethical
Roccetti	2016	Immunology	Biomedical Research	Technical	indirect		NO
Rodrigues	2016	Nano Medicine	Prevention		indirect		NO
			QoC (Clinical Decision Making)
Roelofs	2017
Roski	2014	ALL	Healthcare Management (cost-effectiveness)	Technical	indirect	Privacy	NO
			QoC			Informed Consent
						data ownership
Rossi	2013
Rothstein	2015	ALL	Biomedical Research	Technical	direct	Privacy	YES	non empirical
			Prevention	Regulatory		Autonomy
				Ethical		Informed consent
Rozani	2016	Neurology			indirect		NO
Rumbold	2017	ALL		Regulatory	direct	Privacy	NO
Rumbold	2017	ALL		Regulatory	indirect		NO
						Informed consent
						Data ownership
						Autonomy
						Privacy
						Beneficence
						Proportionality
Sacristan	2015	ALL	QoC (P4)	Methodological	indirect	Informed consent	NO
				Technical		Beneficence
Safran	2014	ALL		Technical	indirect	Informed consent	NO
				Regulatory		Privacy
						Patient Empowerment
Sakian	2017	ALL	QoC (P4)	Ethical	indirect	Confidentiality	NO
				Technical		Autonomy
						Informed consent
						Privacy
Salas-Vega	2015	ALL	Healthcare Management (Access to Health)	Ethical	direct	Confidentiality	NO
			Healthcare Management (Resources Allocation)	Technical
				Methodological		Fairness & Justice
				Regulatory
Salerno	2017	ALL		Technical	direct	Informed consent	YES	non empirical
				Ethical
						Confidentiality
						Privacy
						Safety (Non-maleficience)
Salman	2017	Cardiology	QoC		indirect		NO
			QoC (Patient Safety)
Scalzo	2015	Neurology	QoC (Diagnostics)		indirect	Utility	NO
Schadt	2012	ALL		Ethical	direct	Privacy	NO
				Technical		Data ownership
						Informed consent
Scheepers	2016
Scheneeweiss	2014	ALL	QoC (P4)	Methodological	indirect	Privacy	NO
			Prevention	Technical
Schroeder	2014	ALL	QoC		indirect	Privacy	NO
Schunk	2014
Scott	2017
Scott	2017	ALL	Healthcare Management (cost-effectiveness)	technical	indirect	trust	NO
Sekiewicz	2016
Sen	2017	ALL	QoC (Patient Safety)		indirect		NO
			QoC
Sessler	2014		Healthcare Management (Resources Allocation)		indirect		NO
			Biomedical Research
Sethi	2017	Cardiology	QoC (Patient Safety)		indirect		NO
Shaban	2016
Shaikh	2014	Oncology	Prevention		indirect	Patient Empowerment	NO
			QoC (P4)
Sharon	2016	ALL	Biomedical Research		direct	Privacy	YES	non empirical
			QoC (P4)			Trust
						Informed Consent
Sherman	2015	Neurology	Prevention		indirect		NO
			Biomedical Research			Privacy
Shin	2014
Shneiderman	2015	ALL		Technical	indirect		NO
Shaouval	2015	Oncology	QoC	Technical	indirect		NO
			QoC (Diagnostics)
Sidhu	2016
Simpao	2015	Anestetisiology	QoC		indirect	Privacy	NO
			Biomedical Research			Autonomy
			QoC (Clinical Decision Making)
Singer	2017
Singh	2017	Pediatrics	QoC		indirect		NO
			QoC (Health Monitoring)
Slade	2013
Slobogean	2015	Orthopedics	Healthcare Management (cost-effectiveness)	Technical	indirect		NO
				Methodological
			QoC (Diagnostics)	Regulatory
Smith	2016	ALL	QoC		direct	Transparency	NO
			Biomedical Research
			QoC (Clinical Decision Mking)			Autonomy
			Healthcare Management (cost-effectiveness)
Soares	2012	ALL	Healthcare Management (Risk Assessment)	Ethical	indirect	Privacy	NO
			Healthcare Management (Resources Allocation)	Technical
Song P.	2015	Geriatrics	QoC	Technical	indirect		NO
			Healthcare Management (Access to Health
Song T.	2015	ALL	Healthcare Management (Risk Assessment)		indirect		NO
Soyer	2017
Spertus	2016	Cardiology	QoC		indirect		NO
Srinvas	2017	Nephrology	QoC (Therapy)		indirect		NO
Stefaniak	2005
Steinberg	2014	Oncology	Prevention		indirect		NO
			Healthcare Management (Risk Assessment)
Sterckx	2016	ALL		ethical	direct	Trust	NO
				Regulatory		Privacy
						Transparency
Stylianou	2017	ALL	Healthcare Management (cost-effectiveness)	Technical	indirect	Privacy	YES	non empirical
			QoC	Ethical
Sukumar	2015	ALL		Technical	indirect		NO
				Methodological
Sukumar	2015	ALL		Technical	indirect		NO
Sun	2017	Oncology	Biomedical Research		indirect		NO
Takahashi	2017	Ophtalmology	QoC		indirect		NO
			QoC (Diagnostics)
Tang	2016	Geriatrics	QoC		indirect		NO
			QoC (Clinical Decision Making)
Tavazzi	2015	ALL	QoC (P4)		indirect		NO
Tavazzi	2016		QoC (P4)	Technical	indirect		NO
			Healthcare Management (cost-effectiveness)	Methodological
			Biomedical Research	Regulatory
Tene	2012	ALL	QoC (Diagnostics)		direct	Privacy	NO
			Prevention			Informed consent
			Biomedical Research (Medical technology development)
Teo	2016	Psychiatry	Healthcare Management (Resource Allocation)		indirect		NO
Toga	2015			Technical	indirect	Privacy	YES	non empirical
				Ethical		Data ownership
						Informed consent
Toga	2015	ALL	Biomedical Research		indirect		NO
			QoC (Diagnostics)
Tomines	2013	ALL	QoC (Health Monitoring)	Technical	indirect	Privacy	NO
			QoC (Diagnostics)	Ethical		Informed consent
			QoC (Clinical Decision Making)			Fairness & Justice
Topaz	2017	ALL	Biomedical Research	Ethical	direct	Privacy	NO
			Healthcare Management (cost-effectiveness)	Technical		Confidentiality
			Healthcare Management (Access to Health)			Fairness & Justice
						Risk of discrimination
Torous	2015	Psychiatry	Biomedical Research (Medical technology development)	Technical	indirect		NO
			QoC (P4)
Trifirò	2017	ALL	QoC (Diagnostics)		indirect		NO
			Biomedical Research
Troijano	2015	Neurology	QoC (Clinical Decision Making)		indirect		NO
Trollor	2017
Tu	2015	Cardiology	QoC	Methodological	indirect		NO
			QoC (Clinical Decision Making)
Vaitsis	2014
Vandenberghe	2017	Oncology	QoC (Diagnostics)		indirect		NO
			QoC (Clinical Decision Making)
Vayena	2017	ALL	Biomedical Research (Data availability)	Ethical	direct	Privacy	YES	non empirical
				Regulatory		Informed consent
						Trust
						Autonomy
						Data ownership
Vayena	2015	Epidemiology	Biomedical research (Real World Data)		direct	Privacy	NO
			QoC (Health Monitoring)			Fairness & justice
			QoC (P4)			Transparency
						Fairness & Justice
						Trust
						Accountability
						Trust
Vedula	2017	ALL	Prevention	Technical	indirect	Privacy	YES	non empirical
			QoC (Diagnostics)	Methodological
			QoC (Clinical Decision Making)			Confidentiality
			QoC
Velthuis	2013
Verma A.	2016
Verma M.	2017
Vicini	2017	ALL	QoC (P4)	Technical	indirect	Privacy	NO
			QoC (Diagnostics)			Fairness & Justice
			Biomedical Research
						Risk of discrimination
Vie	2013	Psychiatry	Healthcare Management (cost-effectiveness)	Technical	indirect	Privacy	NO
			Biomedical Research
Vie	2015	Nursing	QoC (Clinical Decision Making)		indirect		NO
Wade	2014
Wall	2012	Neurology	QoC (Diagnostics)		indirect		NO
Wan	2017	ALL	Biomedical Research (Data availability)	Technical	direct	Privacy	NO
			QoC	Ethical
Wang	2016	ALL	Prevention		indirect		NO
			Healthcare Management (Risk assessment)
Weber	2014	ALL	Healthcare Management (cost-effectiveness)	ethical	indirect	Privacy	NO
			QoC	Social
				Technical
Weichert	2015
West	2016	ALL			direct	Safety	YES	empirical
						Confidentilaity
Westra	2015	Nursing	Biomedical Research	Methodological	indirect		NO
			Biomedical research (Clinical Translation)
Whitby	2015	ALL	QoC	Technical	direct	Fairness & Justice	NO
			QoC (Clinical Decision Making)	Social
				Ethical
White	2015
Williams	2013	ALL	Healthcare Management (Risk assessment)	Technical	direct	Privacy	NO
						Confidentiality
Wu	2016	ALL	QoC		indirect		NO
			Biomedical Research (Medical technology development)
Wu	2017		QoC		indirect	Privacy	NO
Xu K.	2015			Technical	indirect	Privacy	NO
Xu S.	2016	ALL	Qoc	Technical	indirect		NO
			Healthcare Management (Risk Assessment)	Ethical
Xue	2017
Yang	2016
Yu K.	2016	ALL	QoC (P4)	Technical	indirect	Privacy	NO
				Methodological		Informed consent
				Ethical
				Regulatory
Yu W.	2016	ALL	Prevention		indirect		NO
			QoC
Zach	2015	Neurology	QoC		indirect		NO
			Biomedical Research (Clinical Translation)
Zhang J.	2014	Traditional Chinese medicine	QoC (P4)		indirect		NO
			Prevention
			QoC (Diagnostics)
Zhang Y.	2016	ALL	Healthcare Management (Risk assessment)	Ethical	indirect	Privacy	NO
			QoC (Clinical Decision Making)	Technical
			Prevention
			QoC (Health Monitoring)
Zook	2017	ALL	Biomedical Research	Ethical	indirect	Privacy	YES	non empirical
				Social
				Technical		Confidentiality
Zwitter	2014	ALL	QoC	Ethical	indirect	Privacy	NO
			Biomedical Research			Informed consent
						Patient Empowerment
